# Supplementary material for: De novo and rare inherited mutations implicate the transcriptional coregulator TCF20/SPBP in autism spectrum disorder
Source: PubMed Central journal article supplement (PMC4215269; doi:10.1136/jmedgenet-2014-102582), 2014-09-16
Supplement: jmedgenet-2014-102582-s1.pdf [file jmedgenet-2014-102582-s1.pdf]

Additional online material

***De novo* and rare inherited mutations implicate the transcriptional coregulator TCF20/SPBP in autism spectrum disorder** by Christian Babbs, Deborah Lloyd *et al*

**Supplementary note**

Members of International Molecular Genetic Study of Autism Consortium (IMGSAC)

**UK**

Jeremy R. Parr, Institute of Neuroscience, Newcastle University, UK; [Jeremy.Parr@ncl.ac.uk](mailto:Jeremy.Parr@ncl.ac.uk)

A. S. Le-Couteur, Institute of Health and Society, Newcastle University, UK;

[a.s.le-couteur@ncl.ac.uk](mailto:a.s.le-couteur@ncl.ac.uk)

Gillian Baird, Guy's and St Thomas' NHS Trust & King's College London, UK;

[gillian.baird@gstt.nhs.uk](mailto:gillian.baird@gstt.nhs.uk)

Andrew Pickles, Institute of Psychiatry, King's College London, UK; [andrew.pickles@kcl.ac.uk](mailto:andrew.pickles@kcl.ac.uk)

Patrick Bolton, Institute of Psychiatry, King's College London, UK; [patrick.bolton@kcl.ac.uk](mailto:patrick.bolton@kcl.ac.uk)

Alistair Pagnamenta, Wellcome Trust Centre for Human Genetics, University of Oxford, UK;

[alistair@well.ox.ac.uk](mailto:alistair@well.ox.ac.uk)

Richard Holt, Wellcome Trust Centre for Human Genetics, University of Oxford, UK;

[richard.holt@ndcn.ox.ac.uk](mailto:richard.holt@ndcn.ox.ac.uk)

Inês Girão Meireles de Sousa, Wellcome Trust Centre for Human Genetics, University of Oxford, UK; [ines.meireles.sousa@gmail.com](mailto:ines.meireles.sousa@gmail.com)

Nuala Simpson, Wellcome Trust Centre for Human Genetics, University of Oxford, UK;

[nuala.simpson@well.ox.ac.uk](mailto:nuala.simpson@well.ox.ac.uk)

Simon Wallace, University of Oxford Department of Psychiatry, UK;

[Simon.Wallace@autistica.org.uk](mailto:Simon.Wallace@autistica.org.uk)

Kerstin Wittemeyer, School of Education, University of Birmingham, UK;

[k.wittemeyer@bham.ac.uk](mailto:k.wittemeyer@bham.ac.uk)

Jonathan Green, Academic Department of Child Psychiatry, University of Manchester, Manchester, UK; [jonathan.green@manchester.ac.uk](mailto:jonathan.green@manchester.ac.uk)

Janine Lamb, Centre for Integrated Genomic Medical Research, The University of Manchester, Manchester, UK; [Janine.Lamb@manchester.ac.uk](mailto:Janine.Lamb@manchester.ac.uk)

**EU**

Sabine Klauck, Division of Molecular Genome Analysis, German Cancer Research Center (DKFZ), Heidelberg, Germany; [s.klauck@dkfz-heidelberg.de](mailto:s.klauck@dkfz-heidelberg.de)

Fritz Poustka, Department of Child and Adolescent Psychiatry, Psychosomatics and Psychotherapy, J.W. Goethe University Frankfurt, Germany; [poustka@em.uni-frankfurt.de](mailto:poustka@em.uni-frankfurt.de)

Maretha de Jonge, Department of Child Psychiatry, Utrecht, The Netherlands;

[M.V.Jonge@umcutrecht.nl](mailto:M.V.Jonge@umcutrecht.nl)

Herman van Engeland, Department of Child Psychiatry, Utrecht, The Netherlands;

[H.vanengeland@planet.nl](mailto:H.vanengeland@planet.nl)

Bernadette Roge, Centre d'Etudes et de Recherches en Psychopathologie, Toulouse, France;

[roge@univ-tlse2.fr](mailto:roge@univ-tlse2.fr)

Sven Bolte, Department of Women's and Children's Health, Karolinska Institutet, Stockholm, Sweden; [sven.bolte@ki.se](mailto:sven.bolte@ki.se)

Lennart Pedersen, Center for Autisme, Denmark; [lp@centerforautisme.dk](mailto:lp@centerforautisme.dk)

Torban Isager, University Centre for Child and Adolescent Psychiatry Vibeholmsvej, Glostrup, Denmark; [torben.isager@dadlnet.dk](mailto:torben.isager@dadlnet.dk)

Elena Maestrini, Dipartimento di Farmacia e BioTecnologie, Università di Bologna;

[elena.maestrini@unibo.it](mailto:elena.maestrini@unibo.it)

Elena Bacchelli, Dipartimento di Farmacia e BioTecnologie, Università di Bologna;

[elena.bacchelli@unibo.it](mailto:elena.bacchelli@unibo.it)

John Tsiantis, University Department of Child Psychiatry, Athens, Greece; [itsianti@cc.uoa.gr](mailto:itsianti@cc.uoa.gr)

### **Canada**

Anthony Bailey, Department of Psychiatry, University of British Columbia, Vancouver, Canada;

[anthony.bailey@ubc.ca](mailto:anthony.bailey@ubc.ca)

### **USA**

Anthony Monaco, Tufts University, Boston, Massachusetts, USA; [Anthony.Monaco@tufts.edu](mailto:Anthony.Monaco@tufts.edu)

Edwin Cook, Institute for Juvenile Research, Department of Psychiatry, University of Illinois at

Chicago, Chicago, USA; [ecook@psych.uic.edu](mailto:ecook@psych.uic.edu)

Steven Guter, Department of Psychiatry, University of Illinois, Chicago, Illinois, USA;

[sguter@psych.uic.edu](mailto:sguter@psych.uic.edu)

Fred Volkmar, Child Study Centre, Yale University, New Haven, Connecticut, USA;

[fred.volkmar@yale.edu](mailto:fred.volkmar@yale.edu)

Catherine Lord, Weill Cornell Medical College/ New York Presbyterian Hospital, Columbia

University, White Plains, NY, USA; [cal2028@med.cornell.edu](mailto:cal2028@med.cornell.edu)

Bennett Leventhal, Nathan Kline Institute for Psychiatric Research (NKI), Orangeberg, NY, USA;

[Bennett.Leventhal@NKI.RFMH.org](mailto:Bennett.Leventhal@NKI.RFMH.org)

Eric Fombonne, Oregon Health & Science University, Institute for Development & Disability,

Department of Psychiatry, Portland, USA; [fombonne@ohsu.edu](mailto:fombonne@ohsu.edu)

**Table S1.** Primers used to amplify<sup>a</sup> and sequence *TCF20* and *TNRC6B*

| <b>Amplicon</b>                  | <b>Forward Primer 5'-3'</b>                | <b>Reverse Primer 5'-3'</b>                   |
|----------------------------------|--------------------------------------------|-----------------------------------------------|
| <b><i>TCF20</i></b>              |                                            |                                               |
| Exon 2.1                         | GGCAGAAGTTGCATTGAGCTGAGATCGTG              | ATCGCTGCCGCAGCAGCTGCTGCTC                     |
| Exon 2.2                         | CCGGCTAGAAGAGTTCAGCCCTCGTCAG               | GAGGATGGCAGAGTTGAGGGCCGCTGCAT                 |
| Exon 2.3                         | TTACCAGTCCCATCAGCCCTGCCACAG                | ACCTCACAGGAACCTCAGGCTGGTTGTA CTG              |
| Exon 2.4                         | GCAACAACAACACCCTTCTCAGCATGTGATGCAGT        | GAATTTGTGCAGCTATCTGCTTTCTTGGAAGATGAG          |
| Exon 2.5                         | GGCCAATCTTCCTAACACTGTCCAGCACATG            | TAGGTGGCCTTTGAGTGGCTGCAGGATCATC               |
| Exon 2.6                         | GGTGATTGTCTCCCGGGAAGCCATGACAG              | GCCATCCCCTGATGCTCTTGAGTACTCCTAG               |
| Exon 2.7                         | TTCCCAAGCCTCCTGCAGGAAGTGCTTCAG             | CATTCCTCCCAATTCTGGTGTCCGCACTCATG              |
| Exon 2.8                         | CTGTGATATTTCTCCACTAAGACAGATTGTCAG          | TGATAAGCAGAGGCCAGGGTTTCTGAGT                  |
| Exon 2.9                         | GGAGACCCTCATCACATGAATCCACACATGAC           | CCTCAGCTAGTCCATGTCCATCAGTCTCATG               |
| Exon 2.10                        | GCAAACCTTCTCCAGCCAAAAGCAGCGGTCCT           | GAGGGTAACAGCAGGGCAGTTTCTACTATCTG              |
| Exon 2.11                        | CAATTCCTATGCCCATCTTTCTCACAGTCAG            | AACTGTTTCTGCATGTGTCTCTGTCTTCACT               |
| Exon 2.12                        | CAGTCCAGCAAACCAGGAGTTGCACGTAG              | GTGGCTGGGTGGCATATTTTAGTTTGATCTCAG             |
| Exon 2.13                        | CCCCACAGATACCAGAAGGTTCTGCAGATG             | AGGTGGATTCTTCGGGAGAGTGGCTGCA                  |
| Exon 2.14                        | GCCAGTTACCGGAACATGGGTGAC                   | GGCACTTTAATTTGGAGGAATAATCATGTGACATG           |
| Exon 3                           | GAG ACA CGT GCT GAG GTC TAA CAG ATG        | CTGTATGTCCTAATCCTTTGGATGCTCTG                 |
| Exon 4                           | CAA TCC CAG CCA GCA TGA CCA CAC CTA TGT C  | TTCAGGAGGAGCCACCCTCGATCCCATC                  |
| Exon 5                           | CCT GAT TTC TGC ACT GTC CTC TCC CAC CTG    | AGGGCAGAGGCAACGACGCCTGCTG                     |
| Exon 6                           | ACC TAT GTC CAG CTG TGA AGT CTC CAT CTG AC | GGG ACT AAC AGC CGG AGG CAC AG                |
| <b><i>TNRC6B</i><sup>b</sup></b> |                                            |                                               |
| Exon 1                           | CTGATTGACAAACCTACCCGAAGTCACATGATC          | CACGAAATGTCTGAAGCCAGTCTCCATGCTA               |
| Exon 2                           | GAAATGTCGTCTTGCCCACTTACAAGCAT              | CAGGAAAAAAAAATAAAAGATATCGGATATTCAAGCCAAGACAGT |
| Exon 3                           | TGGAAGGATGTCTGAACTGACTCCCAGCT              | GTGACTGCAAACAACCCACCTTAATTACTCTACG            |
| Exon 4                           | GATGTATTTCAAAGACTGTTTCCCAACCCCTCTCT        | CCCAGTGGTTTATATAATGAATGGCTTTCCTGGACT          |
| Exon 5.1                         | GCCCCTTTGAGGGATTAATGGGTAATGAATGC           | CCTTTTCTAGAAAGTTCCTTCTTGACCAGT                |
| Exon 5.2                         | GGACTAGGAAATTGGAGGAATGTGAGTGGTCA           | GTCCCAAGAGTCATTTTTGACCCAGTTGATTTCTGA          |
| Exon 5.3                         | GGAGTGTGGATCTTGGGGTGCAGCTA                 | GACAATCAGGATGTGTGGGCCTGTACG                   |
| Exon 5.4                         | ACAGGAAGTGAAGTTGGAGGTCAAAGCACTG            | CAGAACTTTCCCAATTGCTGTTTTTTGTCTGATCGAC         |
| Exon 5.5                         | CCTCTTGGAAATGAGAATCCCAGCAAGGATC            | CCCCATGCTGAAGTGCCATCATCAATGTC                 |
| Exon 5.6                         | CTGCAACACCTAAGGATGAGGAACCCAGT              | CATTAATAATGTACTACCAGCATCTGCCATCACTAGCAT       |
| Exon 6.1                         | CCACCTCACCCCACTGGATATTATGGCAT              | CCTCAAAAATGAAAAGCTTCACACTTACTAGGCTTCATG       |
| Exon 6.2                         | CTTGGGGTGAGCCAAATGAAAGCAGT                 | GATCCCTCAAAAATGAAAAGCTTCACACTTAC              |
| Exon 7.1                         | GAGATGGAGTAGATAAAATTACAAAGACACGTAATGCTGCA  | GAATGAGCAAGTGCGAACATTTCTAAGCAGGCTA            |
| Exon 7.2                         | GAGTCTGGAACACCACTGGCTCTCAG                 | CCTTACTTAGGACCTTGAGGACCCCACT                  |

|             |                                              |                                                |
|-------------|----------------------------------------------|------------------------------------------------|
| Exon 8      | CTCAAGTCTACATTTTCAGTCTGTATTAATAAAACTCAG      | CTATCCTCCTAAGGAAAAGGACAAAATGACTACACAT          |
| Exon 9      | GTAGTAAGACGTGGCTCTCAGGTGAATAATGC             | CCTATCCCTAATCAAATTGGGCAGGAGATGC                |
| Exon 10     | CCATGAGGATAGTGGGGCAGGTCAC                    | CAAAGACAAAATGGGAACCAAAGCGGTTCTCATG             |
| Exon 11     | GTTTATTGCTAGTGTTCCTCTCTTTCCCTTCTTGCAT        | CAAATTTCCCAAGACAGACAAATGATGCAATAAACTGCA        |
| Exon 12     | GAACACAGCCTGTGATTCTTCTGAGGGATC               | GATTTGAGATTTTGTCTAAAAGTCTTCATCTTTGGCAGCTAG     |
| Exon 13     | AGATTCCTTTTCTTTTCTTTCTTTTATTTTTTGGCTAG       | GCAAATGACCTTTTTAGCCACAGGAAGA                   |
| Exon 14     | GCACAGACCCTTAGGTGTCCTCAGT                    | GCCCAGTTCTTTGCCATCAGAGGCTA                     |
| Exon 15     | CTGATGGCAAAGAACCGGGCACAGTC                   | GTGCAACCCCTACCACAGGCCTAG                       |
| Exon 16     | GTCTTTGAATGACACTTGAAGGCATTCTGGACT            | CCAAGTTCACTGCTACCACCCTCAATCATG                 |
| Exon 17     | CCATCAGCTTCAGAAGACTGTTTGCATTCCAG             | CTTAGTAACATGAATCACAAAAGCAATGTATTCTGAACCTGA     |
| Exon 18     | TTCCTTGTCTCAGAATTCCAACCAGGAGTGC              | CTTTTAGGTACCAGCAAGTACAAATGAAGTCACAACTGA        |
| Exon 19     | CTCTCAAGGTTTCACTGGTTATACTGACATTTATCTTCAG     | GCTGTATCTGGCTCATCCTTCCTGAGACT                  |
| Exon 20     | GTAGTCACTGAAAATTTTATGTTTCGTTATGCTCTAAGAACAGT | CTTTTCCTCTACCAGAAGAAAAGCAGACAACCATG            |
| Exon 21     | GCATAAAAGTGCATAGGAGTCAGGGACCAGT              | CCCAACCTTCCCTCTCTCTTAATACAATCAAGTC             |
| Exon 22     | CAAAATGGGCACACTAGGTCTCAGCCAGT                | CAGCTGCCAGAATACTCACGGGTGCA                     |
| Exon 23     | TATGCTTTAGGATTTTCTGAGATCCATAGCTC             | TTAGTGCTGCTGCTGTTCCAAAAAAGGTCA                 |
| Iso3 Exon 3 | CACAGTATCTGTGGCCTTATTGAGAGAATTTTCAGTCT       | CTCTACTGTTCAATTTCTACCCAACTGTACCTTTTCAG         |
| Iso3 Exon 4 | CAG TGA AAC GGC CCT GTG GTT CTG CA           | CCA ACG TAT ACA TCT CTG ACA AAC ACG CTT ATC AG |

<sup>a</sup>Amplification was carried out in 20 µl reactions containing 10-20 ng of DNA, 1×FastStart buffer (Roche), 1.5 mM MgCl<sub>2</sub>, primers at 0.5 µM, and dNTPs at 200 µM (final concentrations), with 0.75 U of FastStart Taq (Roche). PCR consisted of an initial incubation at 94/95°C for 6/8 min, followed by 35 cycles of denaturation at 94/95°C for 30 s, annealing for 30 s, and extension at 72°C for 30 s, with a final extension for 10 min. The annealing temperature used was 63°C, except for the following amplimers of *TNRC6B*: 6.2, 59°C; 8, 60°C; 11, 62°C; 13, 58°C; 23, 60°C.

<sup>b</sup>*TNRC6B* exon numbering is based on Uniprot Q9UPQ9 isoform 1 (1833 amino acids, 23 exons). The two additional coding exons that occur in isoform 3 are numbered according to their position in that isoform and shown at the bottom of the list.

**Table S2.** Markers used to determine haplotypes surrounding the c.4670C>T variant present in three families

| Marker Name | Marker type    | Genomic location <sup>a</sup> | Primer pair 5'-3'                                                            |
|-------------|----------------|-------------------------------|------------------------------------------------------------------------------|
| Tcfms1      | Microsatellite | 42544517 bp                   | CTTGAACCCAGGAAGTCAAGGCTGCAGT<br>6-FAM CAAGGAATGACTTCCCCACTTTTTACTACACAG      |
| Tcfms2      | Microsatellite | 42433855 bp                   | GTCCTGAAACTACGGAATTCATTATTAGTTCTAC<br>6-FAM GGCAAGAAAAACAGAGGCTTCCAAGTCAGA   |
| Tcfms3      | Microsatellite | 42433133 bp                   | TGTCAAGGTTTTCCCAATGTTTTCTTCGAGGA<br>6-FAM CGGGAAAGGATAATCTGTTCAATAAACAGTACTG |
| Tcfms4      | Microsatellite | 42390888 bp                   | TCAACTCTGTCCCACAGGCCTGTCTG<br>6-FAM TCCAGGGAGGGCAGTGAAAATACCTCAC             |
| Tcfms5      | Microsatellite | 42775494 bp                   | CTCACAGTGGGCGTGGGCTGCT<br>6-FAM CTGGCAGCCTCACATTCCTTATCCA                    |
| Tcfms6      | Microsatellite | 42782403 bp                   | CACTGCACTCTGGCCTGGGTGATG<br>6-FAM GGTTCTGTGATTGTCATGATAGGGCCTCAG             |
| Tcfms7      | Microsatellite | 42939056 bp                   | ATGCCACTTGATCTAGATAGCAAGATGACTAG<br>6-FAM AGACTTGCCAGACCCCACAATCTGTGA        |
| Tcfms8      | Microsatellite | 43053571 bp                   | GGGGAGGCTAAGGGAGGTCTATAGATC<br>6-FAM CTACAGGCCAGTAGGAAACCATTCTCTCTG          |
| rs5758652   | SNP            | 42612408 bp                   | TGTGGAACCCATATGGGCTGAGTGTC<br>ATTTCTCTGCTTTCATGTATTAGGGTGATCACTG             |
| rs16986035  | SNP            | 42602139 bp                   | GATGTGCATATGTGTATGTGACCATCTGACAGTGT<br>TTGAACTCCTGACCTCAGGCGATCTGC           |
| rs4453786   | SNP            | 42563308 bp                   | AAATGGGAGGACTTCTGTGTCGACCTCAG<br>CCCCACTTTGCTCTGATCCCTTCACTG                 |
| rs2899354   | SNP            | 42554409 bp                   | CAGGGATCCTCCGTGTCCCCTGT<br>CACAAAAACCTGCAAAGGGATGTTTACAGCAGCT                |
| rs1548304   | SNP            | 42691488 bp                   | GGCAAGGGACCTGAAGACCCAGTGAT<br>CAGCGGTGGGGAGTGTGGAGTGA                        |
| rs6002674   | SNP            | 42694220 bp                   | GCATCACCCTGTCTCCATTTCTCACATGTC<br>CAACAGTCGGCCCTTTGGGTCAATCG                 |
| rs11704558  | SNP            | 42695148 bp                   | CCTTAGAAGCTGTGGACCAACTGAAACAGAG<br>CCCAGCCAGACATGGCCTCAC                     |
| rs6002676   | SNP            | 42697216 bp                   | GCAGAGCATGGCATCTGCACTTACCAG<br>GCGTGGCACAGAGTAAGTGCTCAGCA                    |

<sup>a</sup>Locations for microsatellites refer to the first nucleotide of the repeat.

**Table S3.** Amino acid sequence altering variants of *TNRC6B* found in 341 ASD samples, comparison with controls, and family follow-up

| Nucleotide change <sup>a</sup> | Amino acid change | Number of heterozygous ASD samples/total sequenced <sup>b</sup> | Number of heterozygous control samples/total sequenced <sup>b</sup> | Exome Variant Server (EA) expressed as rare/common alleles (selected AA frequencies in brackets) | Family follow up                                                                                                     | PolyPhen 2 prediction     |
|--------------------------------|-------------------|-----------------------------------------------------------------|---------------------------------------------------------------------|--------------------------------------------------------------------------------------------------|----------------------------------------------------------------------------------------------------------------------|---------------------------|
| c.46G>A <sup>3</sup>           | p.V16M            | 64/293 [5]                                                      | 75/379 [6]                                                          | 875/7515                                                                                         | -                                                                                                                    | Benign (0.000)            |
| c.108A>C                       | p.K36N            | 1/334                                                           | 1/383                                                               | 0/7620                                                                                           | Absent in affected sibling; transmitted by parent.                                                                   | Probably damaging (0.981) |
| c.622A>G <sup>1&amp;2</sup>    | p.T208A           | 1/335                                                           | n/a                                                                 | 0/8350 (25/3947)                                                                                 | -                                                                                                                    | Benign (0.000)            |
| c.871G>A <sup>1&amp;2</sup>    | p.D291N           | 1/332                                                           | 1/381                                                               | 7/8251                                                                                           | Present in one affected sibling (PDD), absent in another; present in two unaffected siblings; transmitted by parent. | Possibly damaging (0.682) |
| c.875G>A <sup>1&amp;2</sup>    | p.R292K           | 2/332                                                           | 0/381                                                               | 2/8250                                                                                           | Absent in affected sibling; transmitted by parent; other case (singleton) transmitted by parent                      | Benign (0.435)            |
| c.962G>A <sup>1&amp;2</sup>    | p.R321K           | 1/332                                                           | 0/384                                                               | 0                                                                                                | Present in affected sibling; transmitted by parent                                                                   | Possibly damaging (0.932) |
| c.1511C>T <sup>1&amp;2</sup>   | p.S504F           | 1/330                                                           | 0/384                                                               | 0                                                                                                | Transmitted by parent                                                                                                | Probably damaging (0.996) |
| c.2750G>C <sup>1&amp;2</sup>   | p.G917A           | 1/335                                                           | n/a                                                                 | 22/8222                                                                                          | -                                                                                                                    | Probably damaging (0.997) |
| c.2911T>C <sup>1&amp;3</sup>   | p.S971P           | 1/335                                                           | n/a                                                                 | 1/8247 (55/3887)                                                                                 | -                                                                                                                    | Benign (0.005)            |
| c.3043G>A                      | p.E1015K          | 1/335                                                           | 0/384                                                               | 0                                                                                                | Present in one affected and one unaffected sibling; transmitted by parent                                            | Possibly damaging (0.878) |
| c.3359C>A                      | p.P1120Q          | 1/334                                                           | 0/382                                                               | 2/8196                                                                                           | Not present in the one parent tested                                                                                 | Probably damaging (0.999) |
| c.4098delG;<br>4101A>C         | p.I1368fs         | 1/333                                                           | 0/383                                                               | 0                                                                                                | Not present in the one parent tested                                                                                 | n/a                       |

|                |            |       |       |   |                                                 |     |
|----------------|------------|-------|-------|---|-------------------------------------------------|-----|
| c.4318_4320del | p.I1440del | 1/332 | 0/383 | 0 | Transmitted by parent,<br>affected sib untested | n/a |
|----------------|------------|-------|-------|---|-------------------------------------------------|-----|

<sup>a</sup>1&3 = isoform 1 and 3 only; 1&2 = isoform 1 and 2 only; 3 = isoform 3 only. Where no superscript indicated, exon is represented in all 3 isoforms and numbering is given for isoform 1.

<sup>b</sup>The number of samples from each panel found to harbour the variant is shown next to the number of samples successfully screened. Numbers in square brackets refer to homozygous changes. n/a, not available.

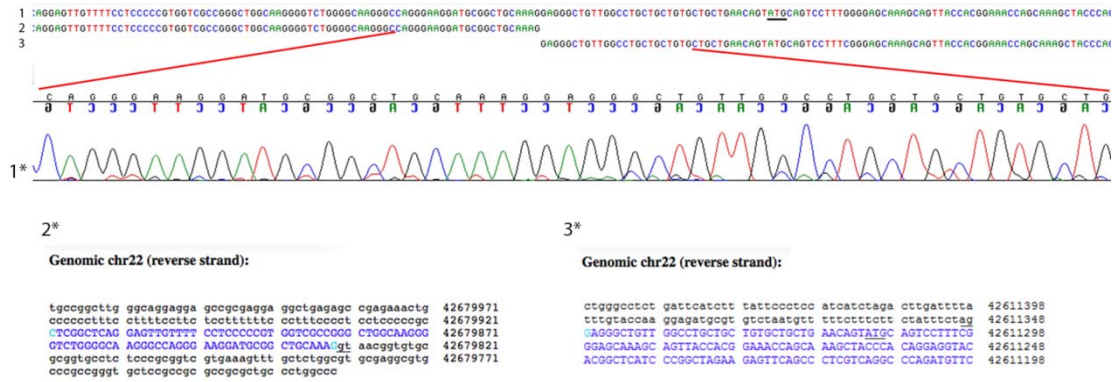

**Figure S1.** The *TCF20* transcript contains a previously unannotated first exon that encodes an alternative untranslated region. The upper panel shows alignment of sequence obtained via Sanger sequencing of a PCR product amplified from cDNA (1) with sequence from a genomic location ~68,400 bp 5' of the previously annotated first exon of *TCF20* (2) and the region of the first exon which shows contiguity with this sequence (3). The chromatogram from sequence 1 is denoted 1\* while the genomic location of the novel first exon is labelled 2\* and the 5' region of the previously annotated first exon is denoted 3\*. The location of the identified exons within the genomic sequence are shown in 2\* and 3\* denoted by uppercase blue lettering. Note that there is a canonical GT splice donor immediately 3' of the novel exon 1 sequence (lower case underline in 2\*) and an AG splice acceptor 5' of the exon 2 sequence (lower case underline in 3\*). The ATG encoding the initiating methionine is also underlined (upper case lettering) in the upper and lower-right panels.
